# Supplementary material for: Gender Paradox and Adolescent Suicidality during the COVID-19 Pandemic: A Socio-Ecological Investigation
Source: Research Square preprint supplement (doi:10.21203/rs.3.rs-8103603/v1), 2025-12-05
Supplement: Supplementary file 1 [file d4f41137fbf0ad7416de0018.docx]

**Online Supplement A**


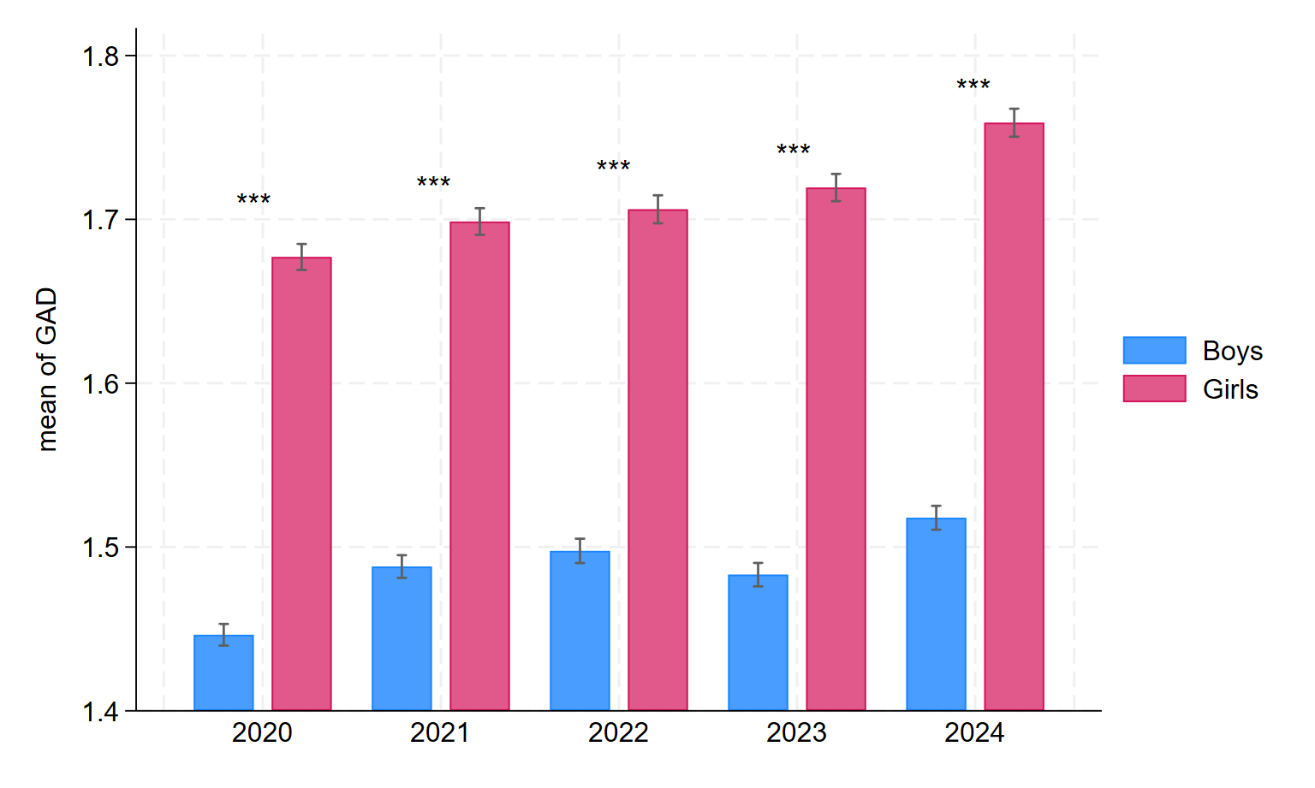
*Data source*: Korean Youth Risk Behavior Survey (2020 – 2024)

**Online Supplement B**

*Data source*: Korean Youth Risk Behavior Survey (2020 – 2024)


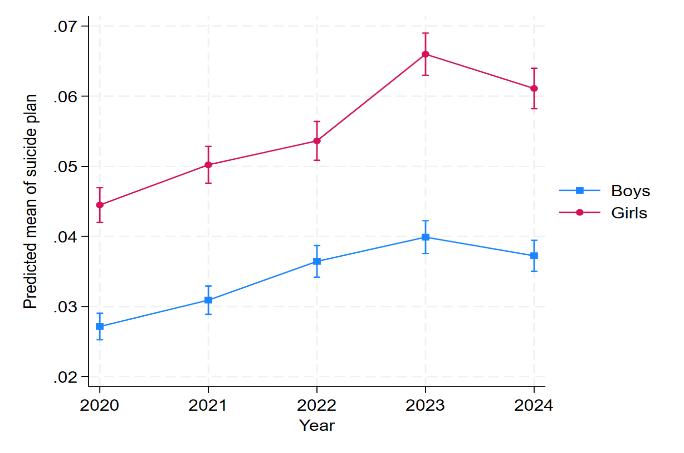

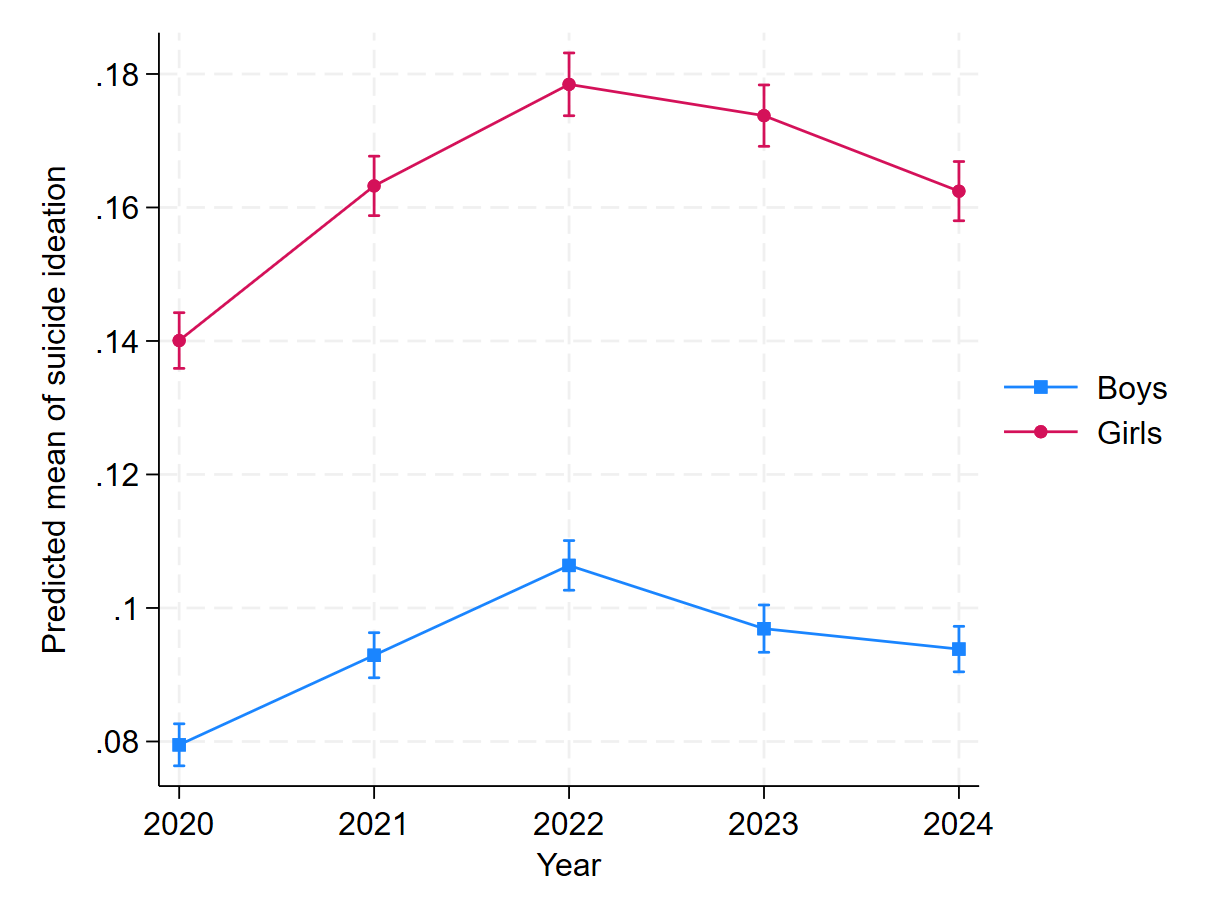

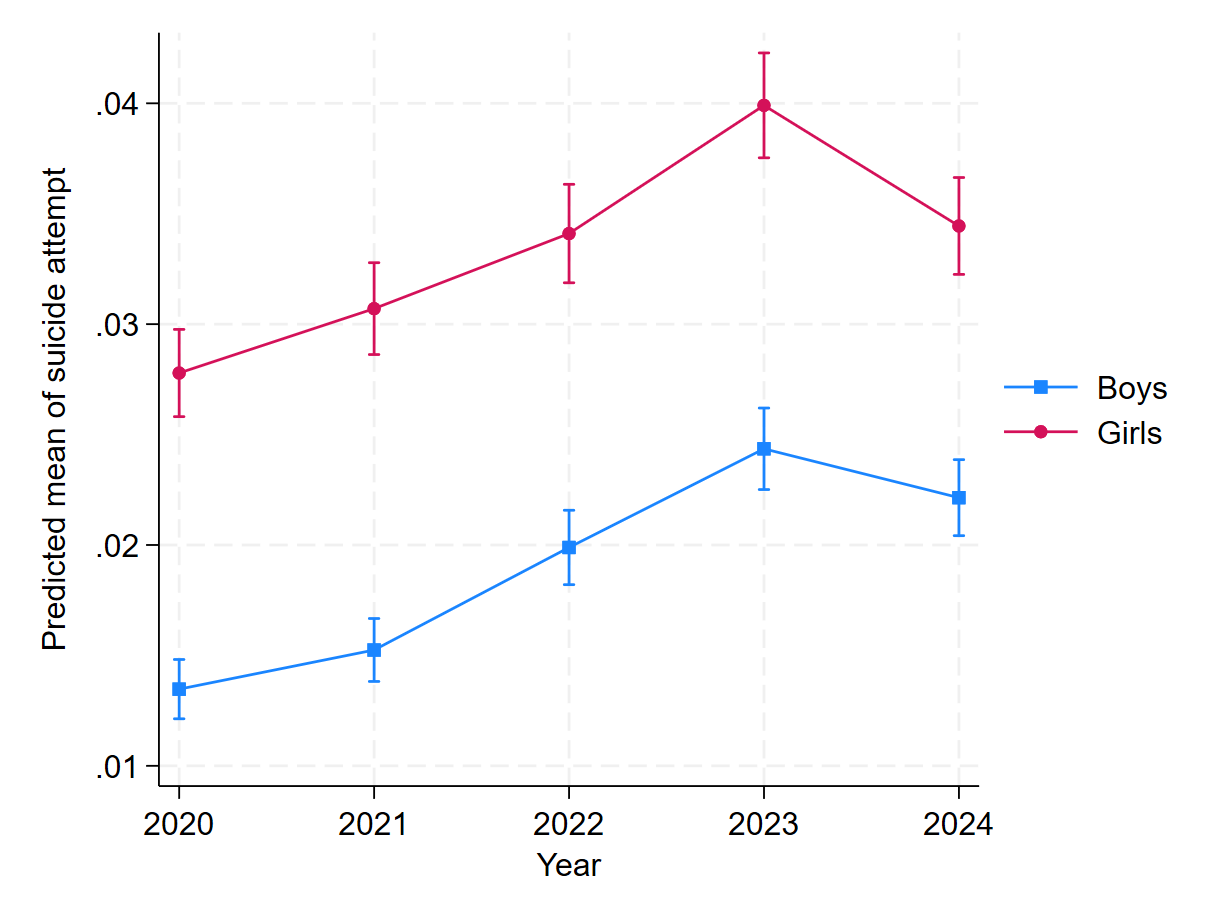


Panel A: Suicide ideation

Panel B: Suicide plan

Panel C: Suicide attempt

**Online Supplement C**


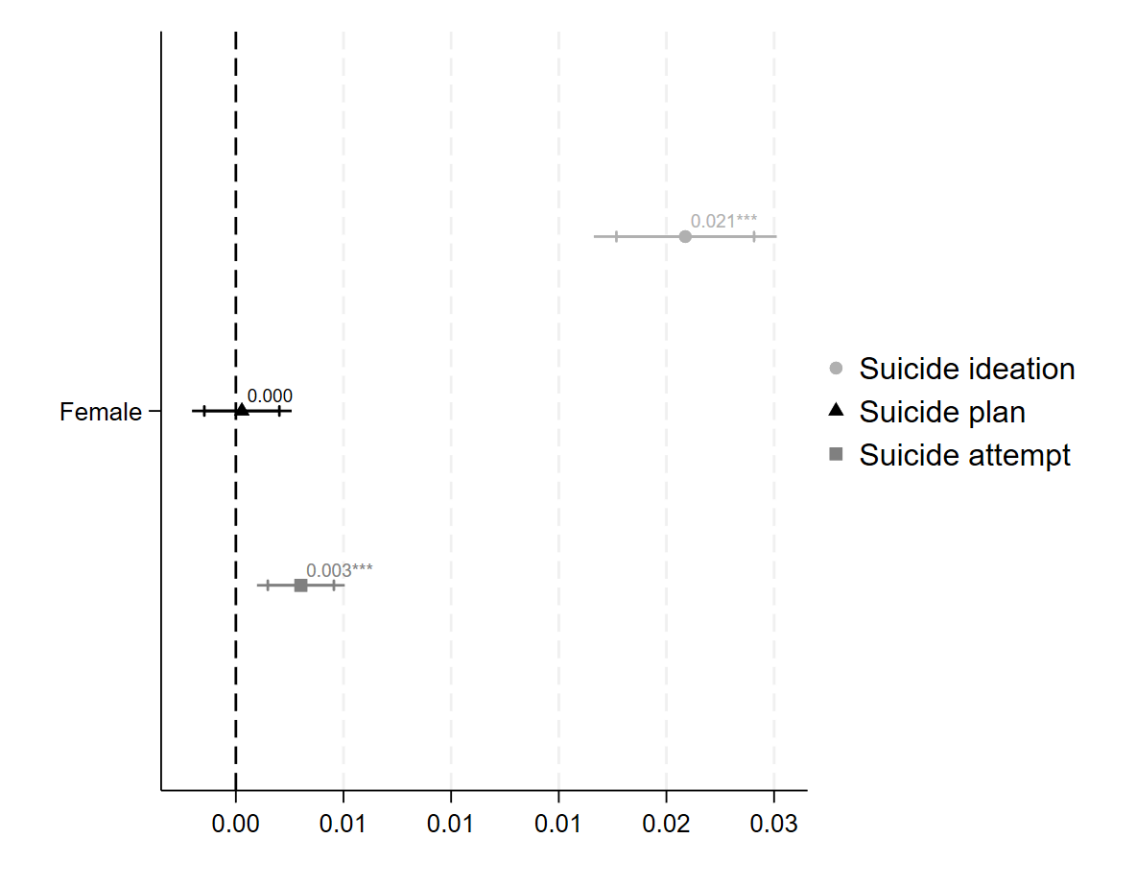


*Note*: Models control for individual-level covariates and Year x region FEs.

**Online Supplement D**

Panel A:Reference group includes boys in same gender/coed schools and girls in coed schools.

| Outcome: | Model 1 (full sample)  *Suicide ideation* | Model 2 (full sample)  *Suicide plan* | Model 3 (full sample)  *Suicide attempt* |
| --- | --- | --- | --- |
| All-girl school | -0.005 (0.003) | -0.005* (0.002) | -0.006*** (0.001) |
| Female | 0.07*** (0.002) | 0.021*** (0.001) | 0.017*** (0.001) |
| Individual controls | ✓ | ✓ | ✓ |
| Time-region FEs | ✓ | ✓ | ✓ |
| Sample size | 214,078 | 214,078 | 214,078 |
| Constant | 0.148*** (0.004) | 0.064*** (0.003) | 0.047*** (0.003) |
| R-squared | 0.023 | 0.009 | 0.009 |

Panel B:Reference group only includes girls in coed schools.

| Outcome: | Model 4 (subsample)  *Suicide ideation* | Model 5 (subsample)  *Suicide plan* | Model 6 (subsample)  *Suicide attempt* |
| --- | --- | --- | --- |
| All-girl school | -0.005 (0.003) | -.004* (0.002) | -0.006*** (0.002) |
| Individual controls | ✓ | ✓ | ✓ |
| Time-region FEs | ✓ | ✓ | ✓ |
| Sample size | 104,427 | 104,427 | 104,427 |
| Constant | 0.222*** (0.006) | 0.091*** (0.005) | 0.069*** (0.004) |
| R-squared | 0.017 | 0.01 | 0.009 |

*Notes:* FEs = fixed effects. All models adjust for age, living arrangement, academic achievement, family socioeconomic status, and self-rated health. Standard errors are clustered at the time-region level. Results in Panel A are based on the full sample containing both genders. Those in Panel B are based on the female subsample.

*Data source*: Korean Youth Risk Behavior Survey (2020 – 2023)

* *p* < .05, *** *p* < .001

**Online Supplement E**


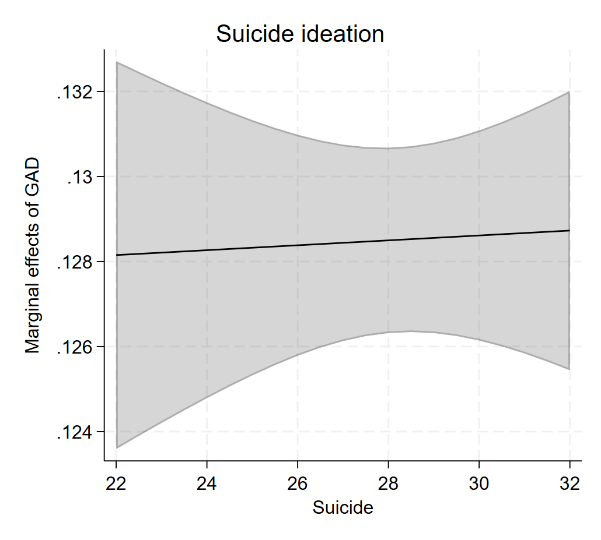

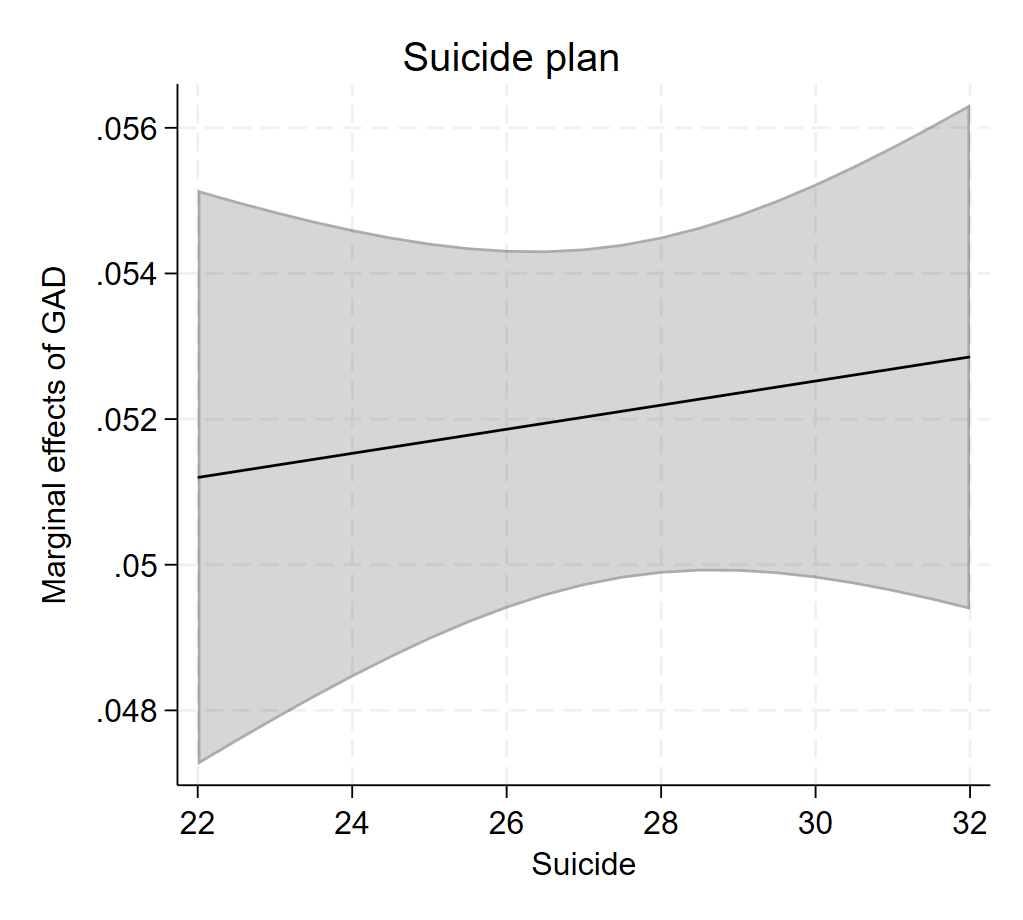

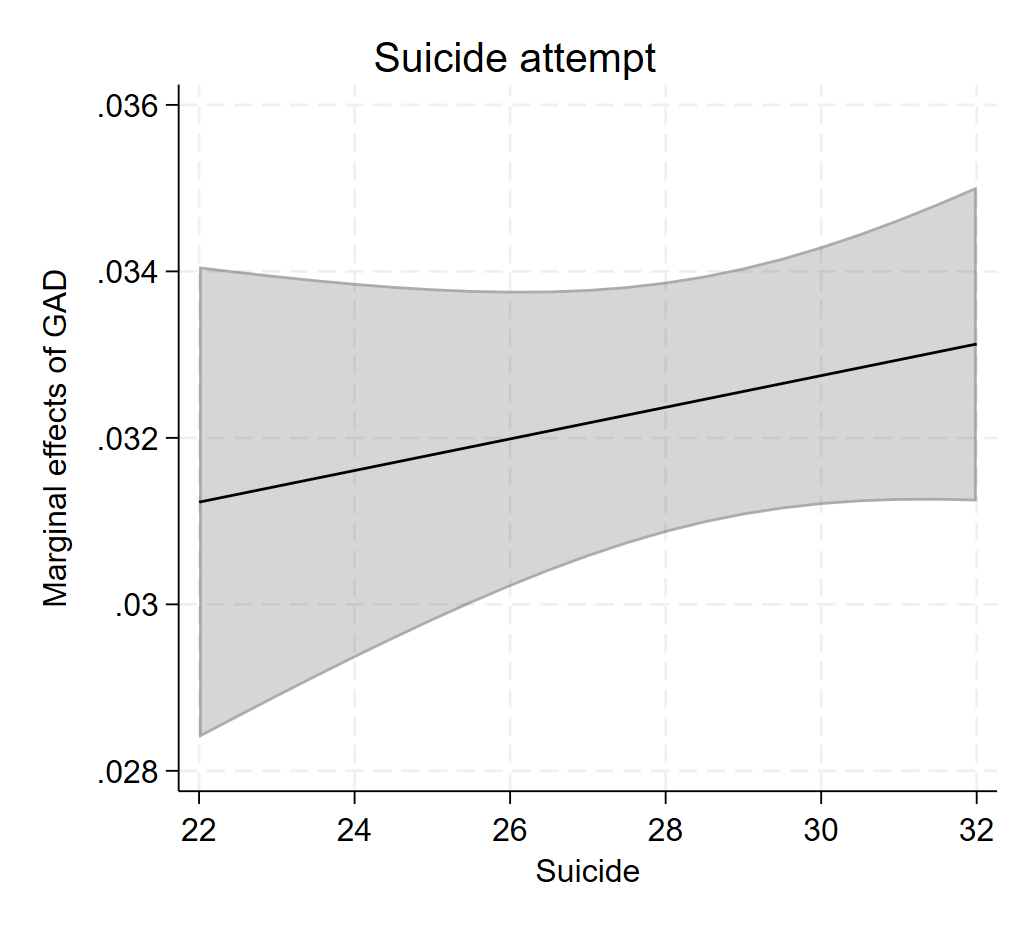


Panel A

Panel B

Panel C

*Note*: Results are based on Panel A in Table 3 using general suicide rate as the contextual moderator. None of the interactions is statistically significant (Panel A: *p* = .859, Panel B: *p* = .572, Panel C: *p* = .293).
